# Supplementary material for: Understanding growth mindset and chemistry mindsets of high-achieving students and the impact of influential language on learning motivation
Source: Royal Society of Chemistry journal article supplement (doi:10.1039/d4rp00218k), 2025-01-01

## Confirmatory Factor Analysis

### Factor Loadings

| Factor                 | Indicator | Estimate | SE     | 95% Confidence Interval |       | Z     | p      | Stand. Estimate |
|------------------------|-----------|----------|--------|-------------------------|-------|-------|--------|-----------------|
|                        |           |          |        | Lower                   | Upper |       |        |                 |
| Growth Mindset         | G2        | 1.023    | 0.0696 | 0.886                   | 1.159 | 14.69 | < .001 | 0.772           |
|                        | G4        | 1.062    | 0.0651 | 0.934                   | 1.190 | 16.32 | < .001 | 0.830           |
|                        | G6        | 0.989    | 0.0704 | 0.851                   | 1.127 | 14.04 | < .001 | 0.747           |
|                        | G8        | 1.119    | 0.0636 | 0.994                   | 1.244 | 17.59 | < .001 | 0.871           |
| Fixed Minset           | G1        | 0.502    | 0.0779 | 0.349                   | 0.654 | 6.44  | < .001 | 0.430           |
|                        | G3        | 1.047    | 0.0951 | 0.860                   | 1.233 | 11.00 | < .001 | 0.841           |
|                        | G5        | 0.560    | 0.0870 | 0.390                   | 0.731 | 6.44  | < .001 | 0.452           |
|                        | G7        | 0.645    | 0.0933 | 0.462                   | 0.828 | 6.91  | < .001 | 0.488           |
| Chemistry intelligence | CI1       | 1.921    | 0.1159 | 1.694                   | 2.149 | 16.58 | < .001 | 0.830           |
|                        | CI2       | 1.741    | 0.1046 | 1.536                   | 1.946 | 16.65 | < .001 | 0.832           |
|                        | CI3       | 1.775    | 0.1043 | 1.571                   | 1.979 | 17.02 | < .001 | 0.842           |
|                        | CI4       | 1.645    | 0.1027 | 1.444                   | 1.846 | 16.02 | < .001 | 0.811           |
|                        | CI5       | 1.665    | 0.1090 | 1.451                   | 1.878 | 15.28 | < .001 | 0.787           |
|                        | CI6       | 1.564    | 0.1124 | 1.344                   | 1.784 | 13.92 | < .001 | 0.735           |

### Factor Estimates

#### Factor Covariances

|                        |                        | Estimate           | SE     | 95% Confidence Interval |         | Z     | p      | Stand. Estimate |
|------------------------|------------------------|--------------------|--------|-------------------------|---------|-------|--------|-----------------|
|                        |                        |                    |        | Lower                   | Upper   |       |        |                 |
| Growth Mindset         | Growth Mindset         | 1.000 <sup>a</sup> |        |                         |         |       |        |                 |
|                        | Fixed Minset           | -0.366             | 0.0658 | -0.495                  | -0.2365 | -5.55 | < .001 | -0.366          |
|                        | Chemistry intelligence | 0.614              | 0.0439 | 0.528                   | 0.7002  | 13.98 | < .001 | 0.614           |
| Fixed Minset           | Fixed Minset           | 1.000 <sup>a</sup> |        |                         |         |       |        |                 |
|                        | Chemistry intelligence | -0.126             | 0.0711 | -0.265                  | 0.0134  | -1.77 | 0.076  | -0.126          |
| Chemistry intelligence | Chemistry intelligence | 1.000 <sup>a</sup> |        |                         |         |       |        |                 |

<sup>a</sup> fixed parameter

### Model Fit

Test for Exact Fit

| $\chi^2$ | df | p      |
|----------|----|--------|
| 167      | 74 | < .001 |

Fit Measures

| CFI   | SRMR   | RMSEA  | RMSEA 90% CI |        |
|-------|--------|--------|--------------|--------|
|       |        |        | Lower        | Upper  |
| 0.953 | 0.0664 | 0.0674 | 0.0538       | 0.0810 |

Path Diagram

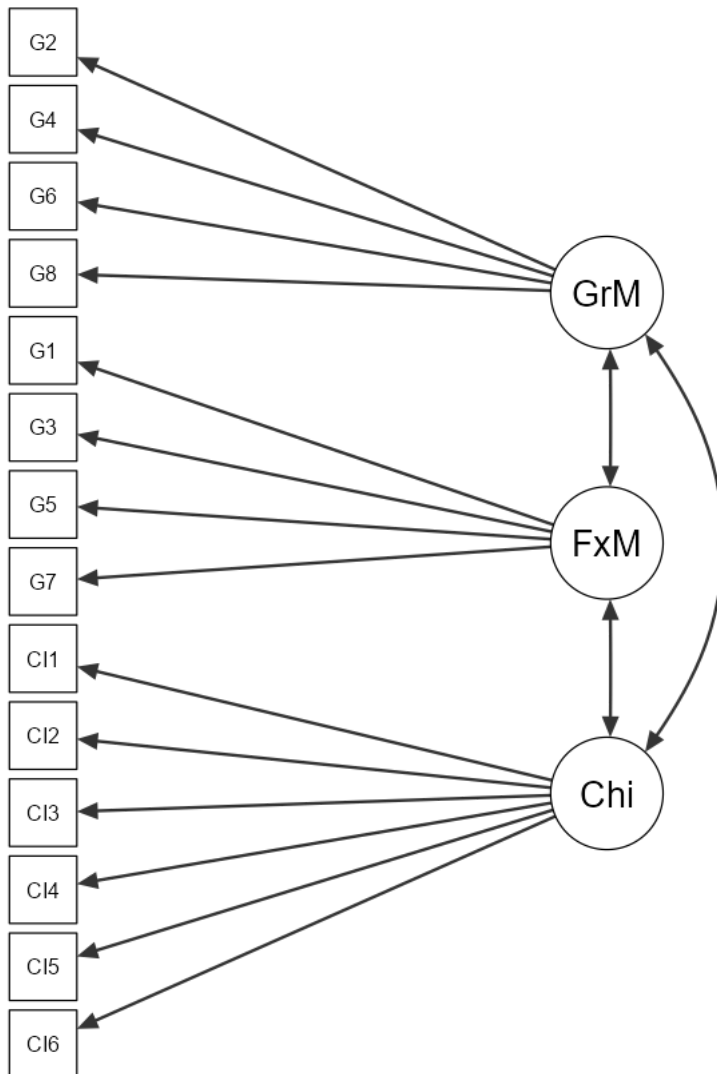

Supplement: d4rp00218k1.pdf [file d4rp00218k1.pdf]
