# Supplementary material for: Understanding growth mindset and chemistry mindsets of high-achieving students and the impact of influential language on learning motivation
Source: Royal Society of Chemistry journal article supplement (doi:10.1039/d4rp00218k), 2025-01-01
Supplement: d4rp00218k2.pdf [file d4rp00218k2.pdf]

**Confidence Intervals**

|                                        | Pearson Correlation | Sig. (2-tailed) | 99.91 % Confidence Intervals (2-tailed) <sup>a</sup> |       |
|----------------------------------------|---------------------|-----------------|------------------------------------------------------|-------|
|                                        |                     |                 | Lower                                                | Upper |
| GPA - Sex                              | .262                | .00000          | .087                                                 | .422  |
| GPA - SES                              | .036                | .51511          | -.145                                                | .214  |
| GPA - Entity theorist                  | -.095               | .08130          | -.270                                                | .086  |
| GPA - Incremental theorist             | .095                | .07988          | -.085                                                | .270  |
| GPA - Chem_In_1                        | .059                | .27564          | -.121                                                | .236  |
| GPA - Chem_In_2                        | .015                | .78208          | -.165                                                | .194  |
| GPA - Chem_In_3                        | .000                | .99455          | -.180                                                | .179  |
| GPA - Chem_In_4                        | .057                | .29743          | -.124                                                | .234  |
| GPA - Chem_In_5                        | -.014               | .79095          | -.193                                                | .165  |
| GPA - Chem_In_6                        | .025                | .64605          | -.155                                                | .204  |
| Sex - SES                              | -.141               | .00934          | -.313                                                | .039  |
| Sex - Entity theorist                  | -.105               | .05326          | -.279                                                | .076  |
| Sex - Incremental theorist             | -.013               | .81248          | -.192                                                | .167  |
| Sex - Chem_In_1                        | -.088               | .10684          | -.263                                                | .093  |
| Sex - Chem_In_2                        | -.009               | .87414          | -.188                                                | .171  |
| Sex - Chem_In_3                        | -.076               | .16256          | -.252                                                | .105  |
| Sex - Chem_In_4                        | .018                | .73809          | -.162                                                | .197  |
| Sex - Chem_In_5                        | -.048               | .38392          | -.225                                                | .133  |
| Sex - Chem_In_6                        | -.137               | .01192          | -.309                                                | .044  |
| SES - Entity theorist                  | -.101               | .06398          | -.275                                                | .080  |
| SES - Incremental theorist             | .180                | .00087          | .001                                                 | .348  |
| SES - Chem_In_1                        | .177                | .00109          | -.003                                                | .345  |
| SES - Chem_In_2                        | .146                | .00720          | -.034                                                | .317  |
| SES - Chem_In_3                        | .151                | .00551          | -.030                                                | .321  |
| SES - Chem_In_4                        | .126                | .02062          | -.055                                                | .299  |
| SES - Chem_In_5                        | .121                | .02668          | -.060                                                | .294  |
| SES - Chem_In_6                        | .164                | .00246          | -.016                                                | .334  |
| Entity theorist - Incremental theorist | -.452               | .00000          | -.584                                                | -.297 |
| Entity theorist - Chem_In_1            | -.284               | .00000          | -.441                                                | -.110 |
| Entity theorist - Chem_In_2            | -.313               | .00000          | -.466                                                | -.141 |
| Entity theorist - Chem_In_3            | -.267               | .00000          | -.426                                                | -.092 |
| Entity theorist - Chem_In_4            | -.270               | .00000          | -.429                                                | -.095 |
| Entity theorist - Chem_In_5            | -.278               | .00000          | -.435                                                | -.103 |
| Entity theorist - Chem_In_6            | -.189               | .00047          | -.357                                                | -.010 |
| Incremental theorist - Chem_In_1       | .477                | .00000          | .326                                                 | .605  |
| Incremental theorist - Chem_In_2       | .532                | .00000          | .389                                                 | .649  |
| Incremental theorist - Chem_In_3       | .464                | .00000          | .310                                                 | .594  |
| Incremental theorist - Chem_In_4       | .442                | .00000          | .285                                                 | .576  |
| Incremental theorist - Chem_In_5       | .461                | .00000          | .307                                                 | .592  |
| Incremental theorist - Chem_In_6       | .470                | .00000          | .318                                                 | .599  |
| Chem_In_1 - Chem_In_2                  | .673                | .00000          | .561                                                 | .760  |
| Chem_In_1 - Chem_In_3                  | .665                | .00000          | .552                                                 | .755  |
| Chem_In_1 - Chem_In_4                  | .569                | .00000          | .434                                                 | .679  |
| Chem_In_1 - Chem_In_5                  | .553                | .00000          | .414                                                 | .666  |
| Chem_In_1 - Chem_In_6                  | .532                | .00000          | .390                                                 | .650  |
| Chem_In_2 - Chem_In_3                  | .742                | .00000          | .649                                                 | .813  |
| Chem_In_2 - Chem_In_4                  | .686                | .00000          | .577                                                 | .770  |
| Chem_In_2 - Chem_In_5                  | .660                | .00000          | .545                                                 | .750  |
| Chem_In_2 - Chem_In_6                  | .572                | .00000          | .437                                                 | .681  |
| Chem_In_3 - Chem_In_4                  | .616                | .00000          | .490                                                 | .716  |
| Chem_In_3 - Chem_In_5                  | .680                | .00000          | .571                                                 | .766  |
| Chem_In_3 - Chem_In_6                  | .604                | .00000          | .476                                                 | .707  |
| Chem_In_4 - Chem_In_5                  | .681                | .00000          | .571                                                 | .766  |
| Chem_In_4 - Chem_In_6                  | .500                | .00000          | .352                                                 | .623  |
| Chem_In_5 - Chem_In_6                  | .560                | .00000          | .423                                                 | .672  |

a. Estimation is based on Fisher's r-to-z transformation.
