# Supplementary material for: Understanding growth mindset and chemistry mindsets of high-achieving students and the impact of influential language on learning motivation
Source: Royal Society of Chemistry journal article supplement (doi:10.1039/d4rp00218k), 2025-01-01

## Descriptives

Descriptives

| GrowthMindset       |        |
|---------------------|--------|
| N                   | 338    |
| Missing             | 0      |
| Mean                | 4.60   |
| Median              | 4.63   |
| Standard deviation  | 0.783  |
| Minimum             | 1.88   |
| Maximum             | 6.00   |
| Skewness            | -0.505 |
| Std. error skewness | 0.133  |
| Shapiro-Wilk W      | 0.977  |
| Shapiro-Wilk p      | < .001 |
| 25th percentile     | 4.13   |
| 75th percentile     | 5.13   |

## Plots

GrowthMindset

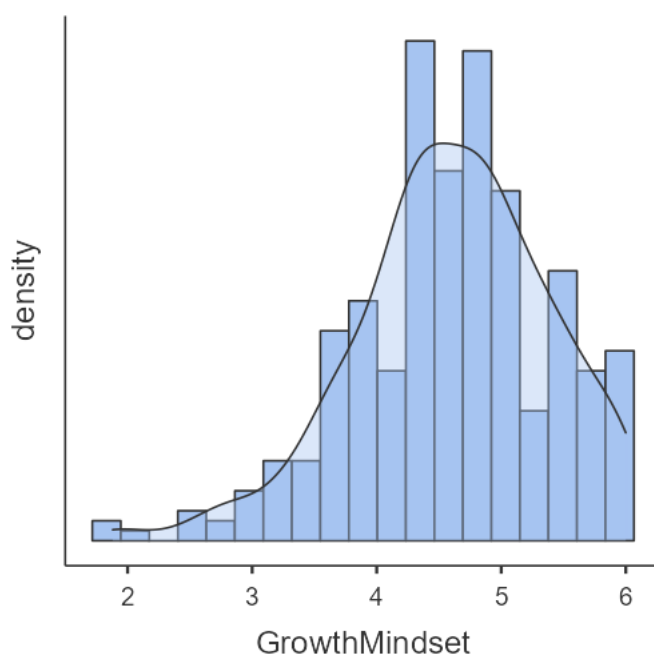

Supplement: d4rp00218k4.pdf [file d4rp00218k4.pdf]
